# Supplementary figures and images for: Small nickel nanoparticle arrays from long chain imidazolium ionic liquids
Source: Royal Society of Chemistry journal article supplement (doi:10.1039/c3nr05048c), 2013-11-11

# Supporting Information

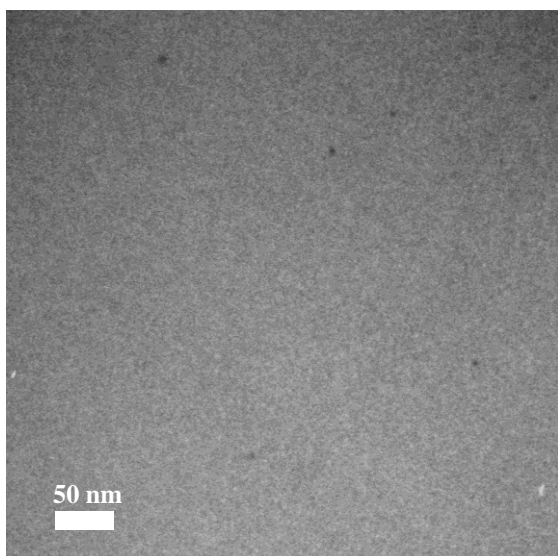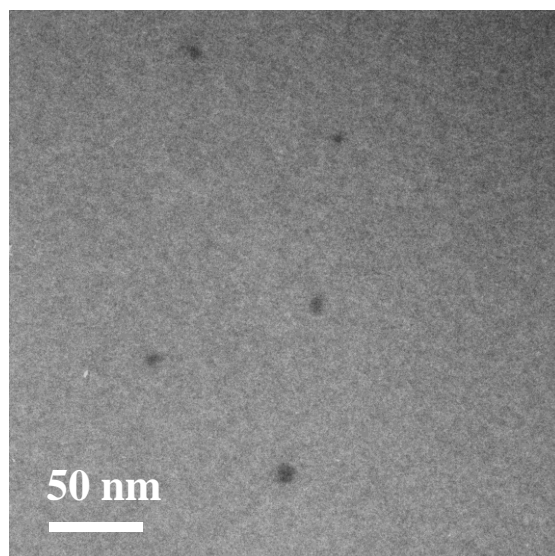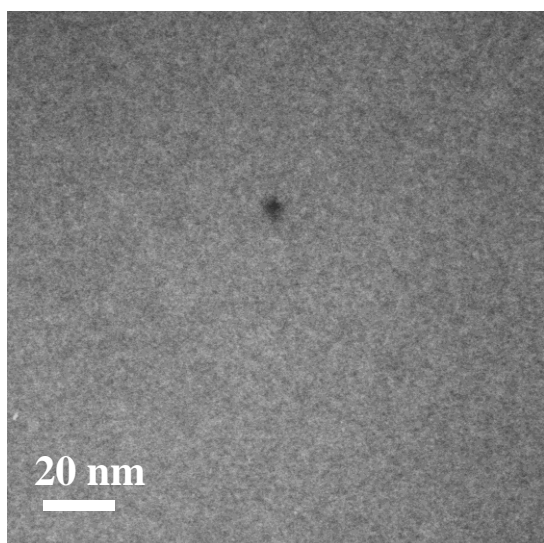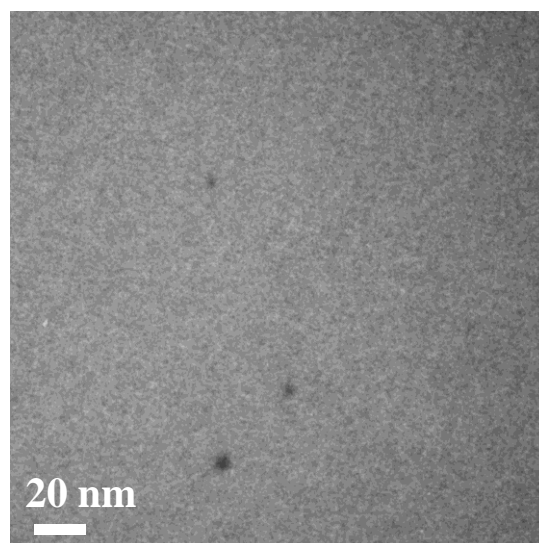

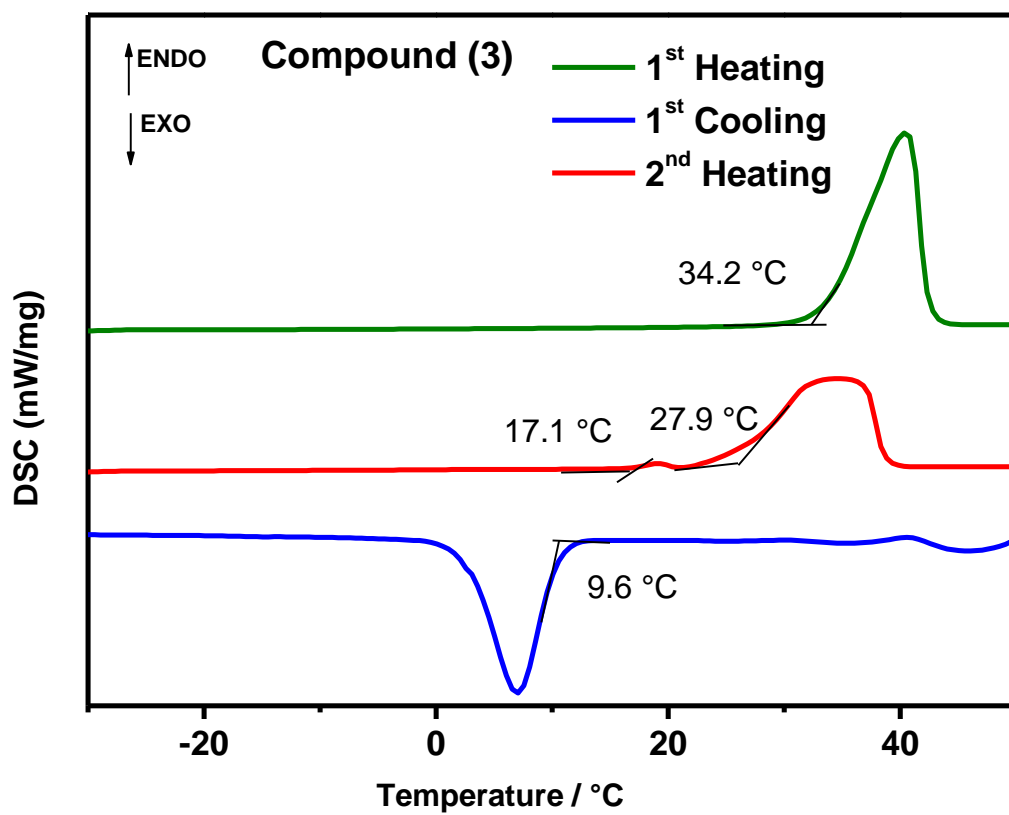

a

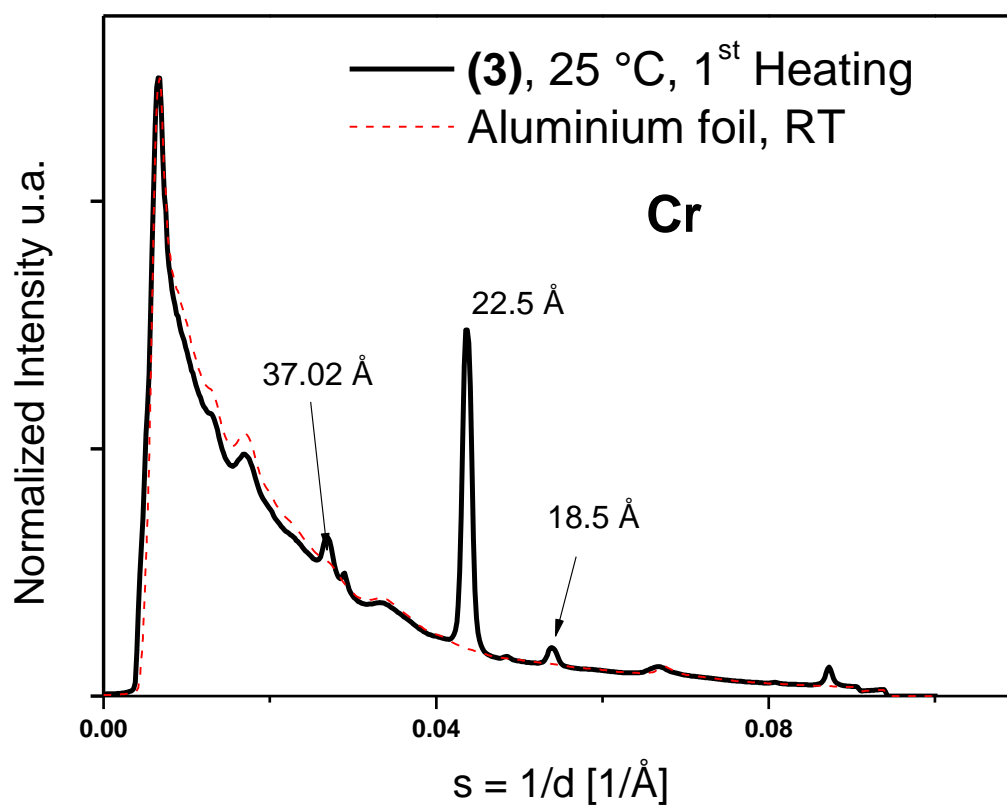

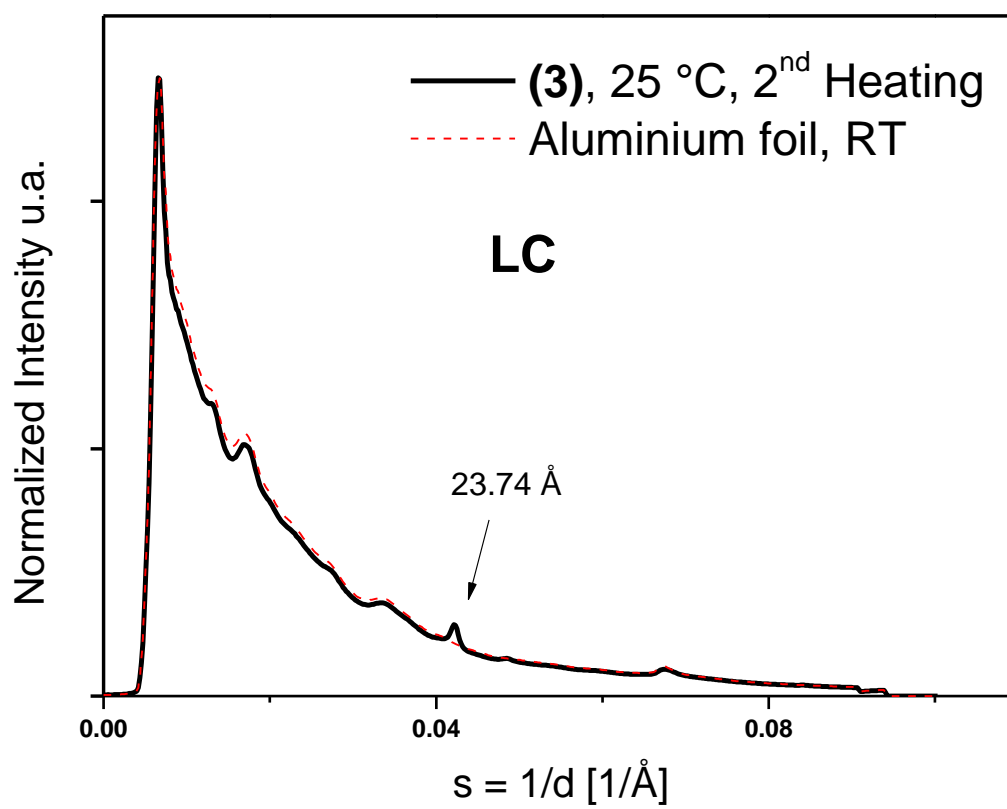

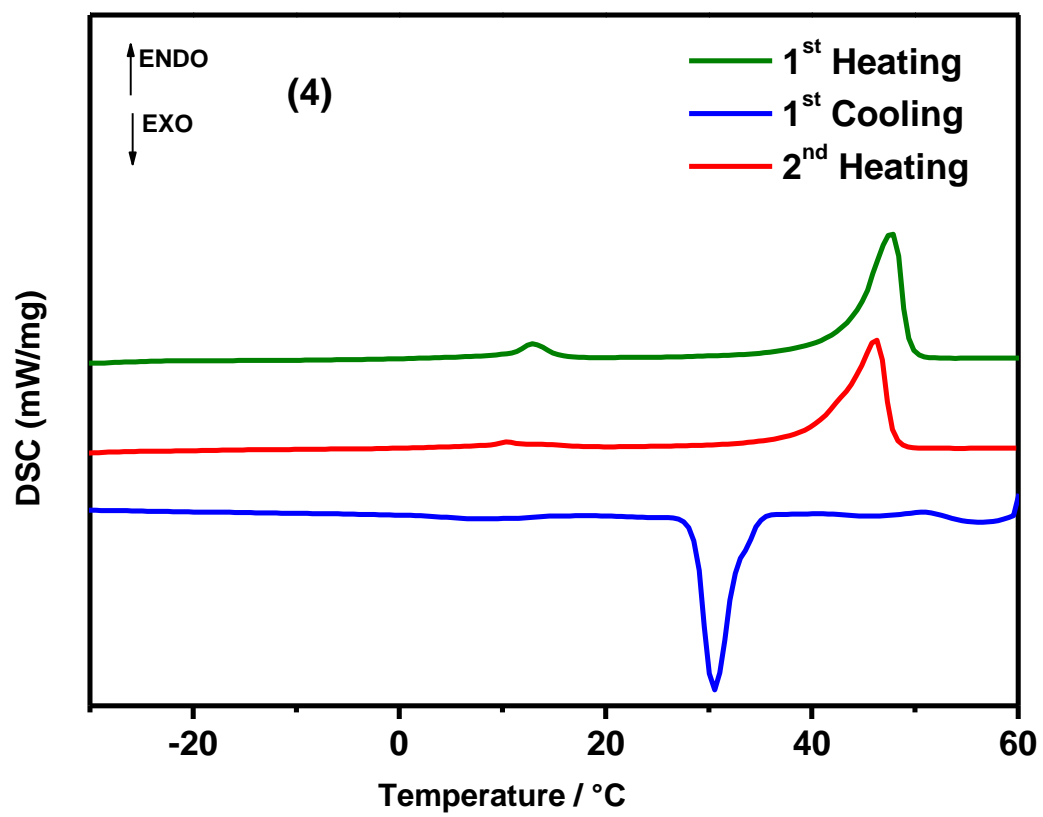

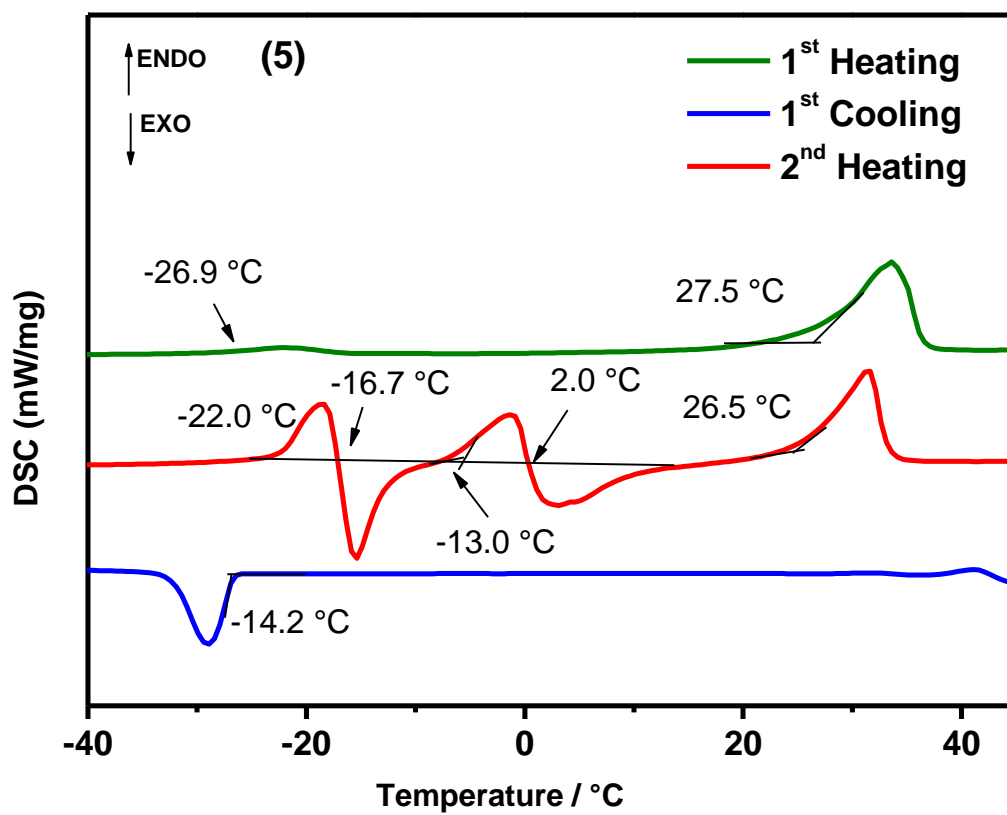

Supplement: c3nr05048c.pdf [file c3nr05048c.pdf]
